# Supplementary material
Source: PubMed Central journal article supplement (PMC6378141)
Supplement: NIHMS977826-supplement-10.pdf [file NIHMS977826-supplement-10.pdf]

|                                                   | <i>WT</i>    |                                               |          | <i>R132L</i> |                                               |          | <i>L123W</i> |                                               |          | <i>L123W:R132L</i> |                                               |          |
|---------------------------------------------------|--------------|-----------------------------------------------|----------|--------------|-----------------------------------------------|----------|--------------|-----------------------------------------------|----------|--------------------|-----------------------------------------------|----------|
|                                                   | <u>pEC50</u> | <u><math>E_{max}</math></u><br>(% <i>WT</i> ) | <u>n</u> | <u>pEC50</u> | <u><math>E_{max}</math></u><br>(% <i>WT</i> ) | <u>n</u> | <u>pEC50</u> | <u><math>E_{max}</math></u><br>(% <i>WT</i> ) | <u>n</u> | <u>pEC50</u>       | <u><math>E_{max}</math></u><br>(% <i>WT</i> ) | <u>n</u> |
| <i>Gi</i> recruitment                             | 6.2<br>± 0.1 | 100.0                                         | 6        | x*           | 9.2<br>± 5.0                                  | 6        | 6.7<br>± 0.1 | 99.6<br>± 8.9                                 | 3        | x*                 | 0.0<br>± 0.0                                  | 3        |
| <i>Arrestin-2</i> recruitment                     | 7.0<br>± 0.1 | 100.0                                         | 3        | 6.0<br>± 0.0 | 77.2<br>± 13.5                                | 3        | 8.1<br>± 0.1 | 124.8<br>± 25.2                               | 3        | 6.6<br>± 0.1       | 132.8<br>± 9.4                                | 3        |
| <i>Arrestin-3</i> recruitment                     | 7.4<br>± 0.1 | 100.0                                         | 6        | 6.2<br>± 0.1 | 47.4<br>± 8.8                                 | 6        | 6.2<br>± 0.1 | 99.8<br>± 8.0                                 | 3        | 6.8<br>± 0.1       | 100.3<br>± 6.8                                | 3        |
| <i>cAMPI</i>                                      | 8.0<br>± 0.1 | 100.0                                         | 3        | x*           | 1.0<br>± 1.0                                  | 3        | 8.5<br>± 0.1 | 107.3<br>± 3.2                                | 3        | x*                 | 3.4<br>± 1.8                                  | 3        |
| <i>AP2</i> interaction                            | 7.5<br>± 0.1 | 100.0                                         | 3        | 7.2<br>± 0.6 | 62.5<br>± 4.2                                 | 3        | 9.0<br>± 0.4 | 139.0<br>± 12.2                               | 3        | 6.8<br>± 0.4       | 103.8<br>± 8.6                                | 3        |
| <i>Surface</i><br><i>expression</i>               |              | <u>% <i>WT</i></u>                            | <u>n</u> |              | <u>% <i>WT</i></u>                            | <u>n</u> |              | <u>% <i>WT</i></u>                            | <u>n</u> |                    | <u>% <i>WT</i></u>                            | <u>n</u> |
|                                                   |              | 100.0                                         | 7        |              | 86.8<br>± 11.1                                | 7        |              | 60.5<br>± 6.4                                 | 7        |                    | 75.5<br>± 8.2                                 | 6        |
|                                                   |              | <u>% <i>Vehicle</i></u>                       | <u>n</u> |              | <u>% <i>Vehicle</i></u>                       | <u>n</u> |              | <u>% <i>Vehicle</i></u>                       | <u>n</u> |                    | <u>% <i>Vehicle</i></u>                       | <u>n</u> |
| <i>10 μM DA-induced</i><br><i>internalization</i> |              | 19.0<br>± 4.1                                 | 4        |              | 11.7<br>± 4.3                                 | 4        |              | 22.1<br>± 4.4                                 | 6        |                    | 20.2<br>± 4.2                                 | 6        |

\*x indicates unreliable pEC50 values that result from weak functional responses.
