# Supplementary material
Source: PubMed Central journal article supplement (PMC6378141)

**A**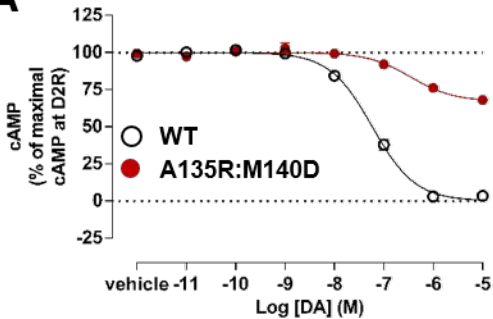**B**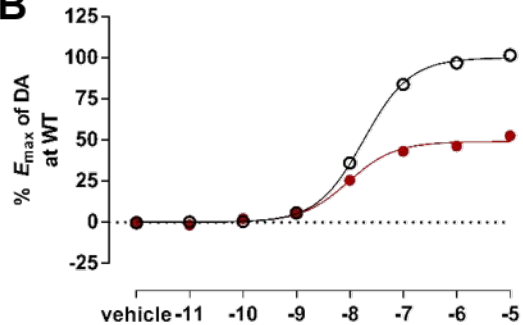**C**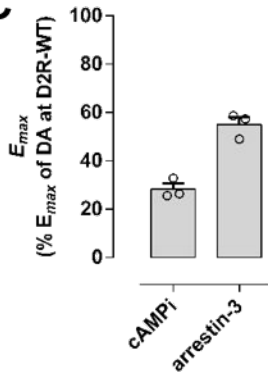**D**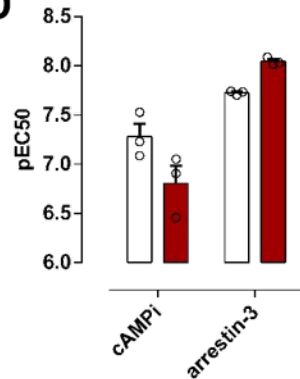

Supplement: NIHMS977826-supplement-1.pdf [file NIHMS977826-supplement-1.pdf]

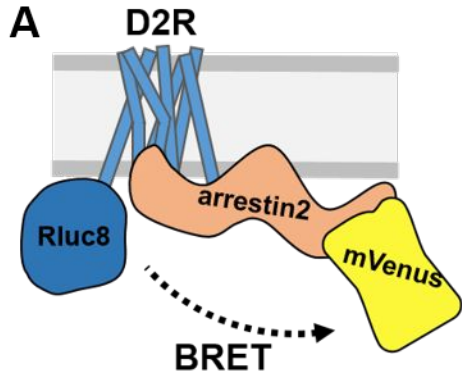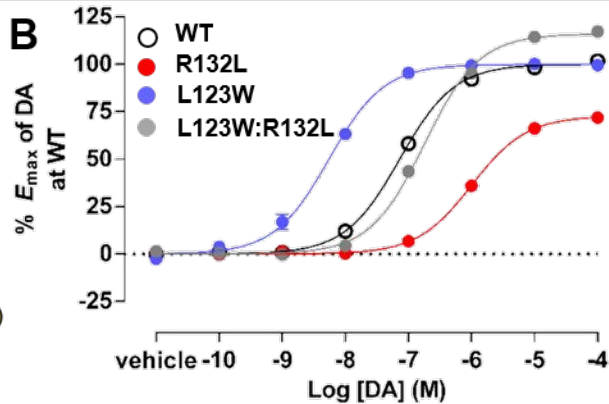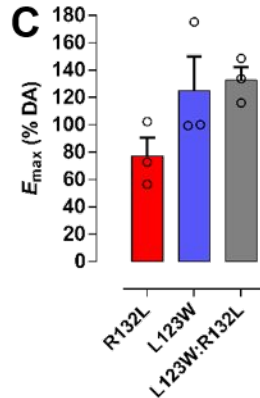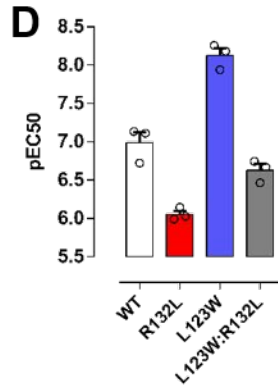

Supplement: NIHMS977826-supplement-2.pdf [file NIHMS977826-supplement-2.pdf]

*D2R-mVenus*

*tdTomato*

*merge*

**WT**

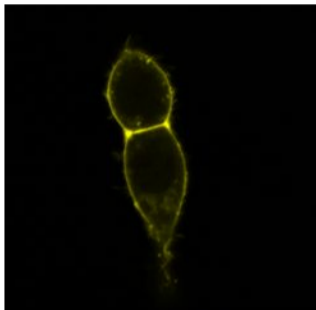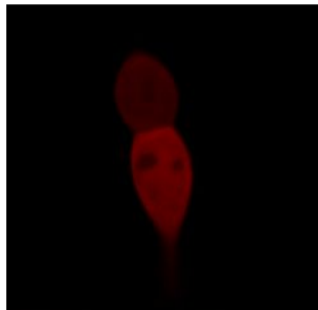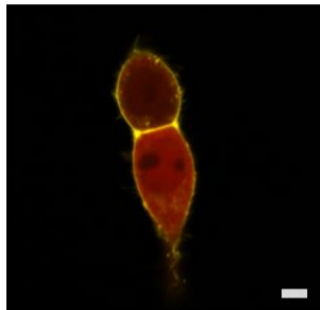

**L123W:R132L**

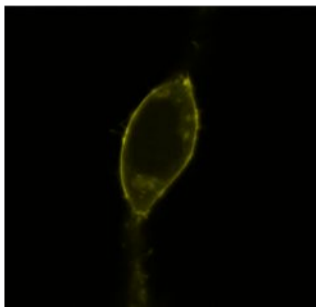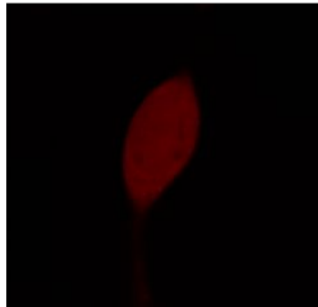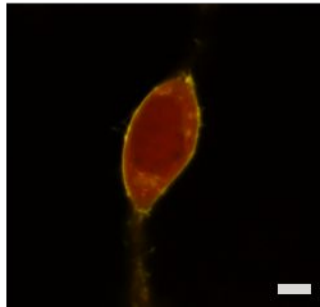

Supplement: NIHMS977826-supplement-3.pdf [file NIHMS977826-supplement-3.pdf]

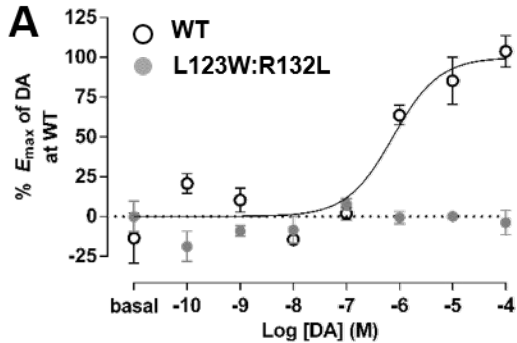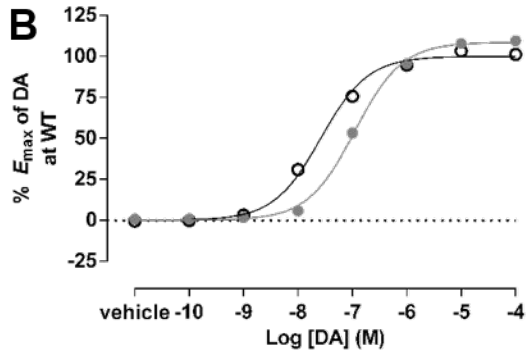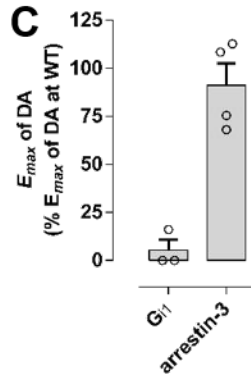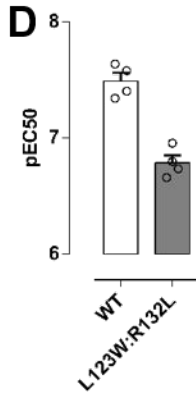

Supplement: NIHMS977826-supplement-4.pdf [file NIHMS977826-supplement-4.pdf]

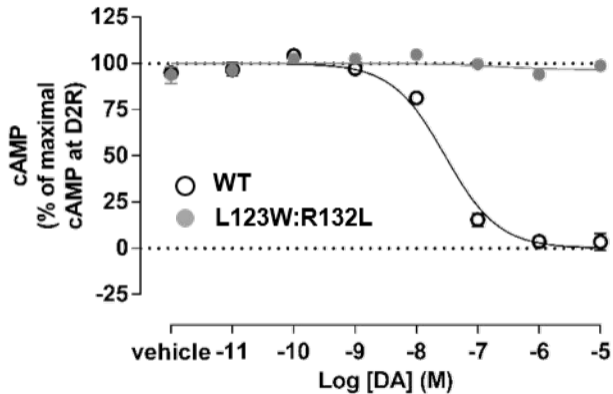

Supplement: NIHMS977826-supplement-5.pdf [file NIHMS977826-supplement-5.pdf]

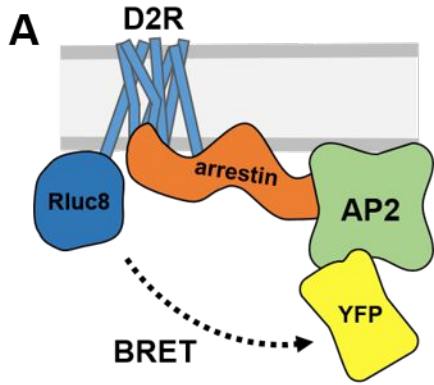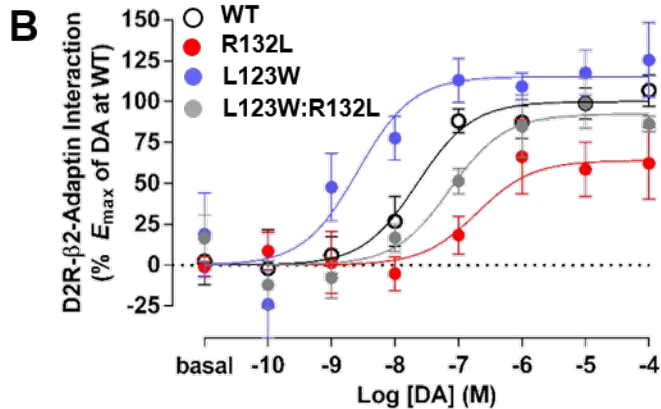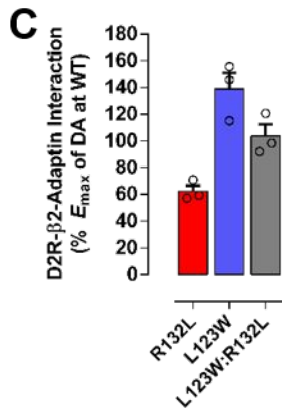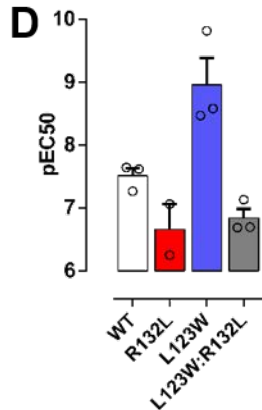

Supplement: NIHMS977826-supplement-6.pdf [file NIHMS977826-supplement-6.pdf]

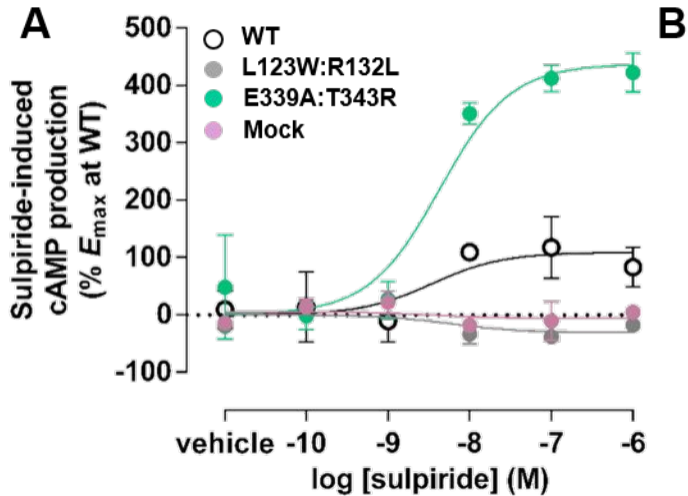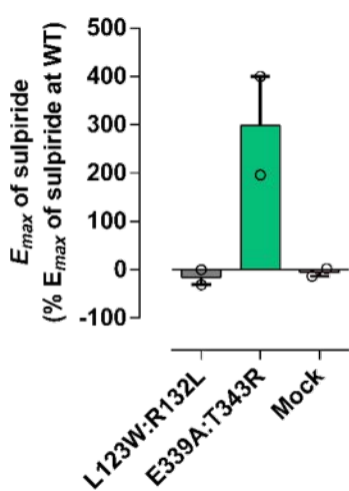

Supplement: NIHMS977826-supplement-7.pdf [file NIHMS977826-supplement-7.pdf]

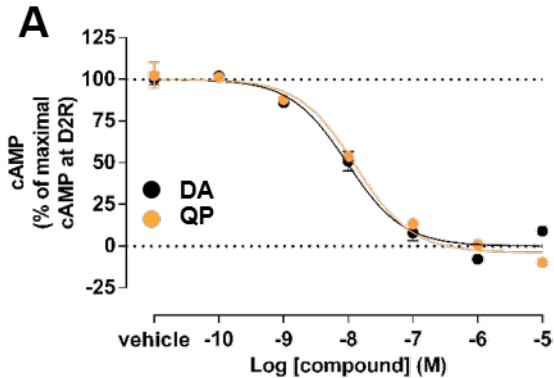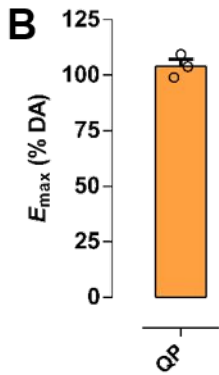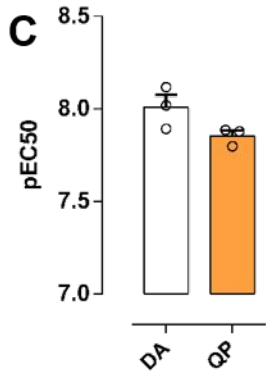

Supplement: NIHMS977826-supplement-8.pdf [file NIHMS977826-supplement-8.pdf]

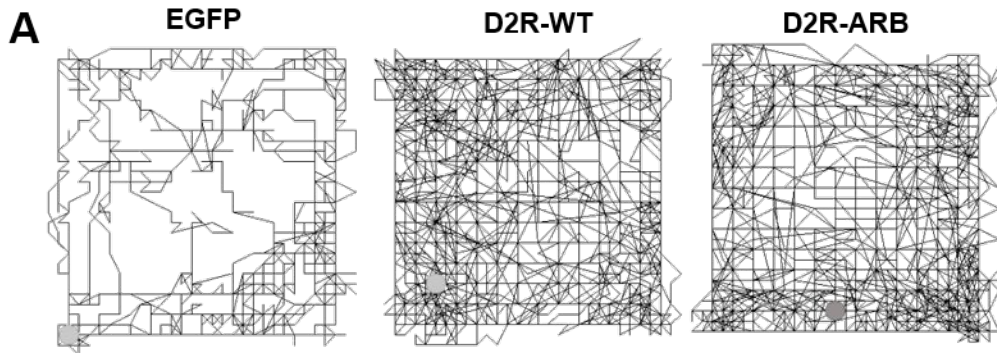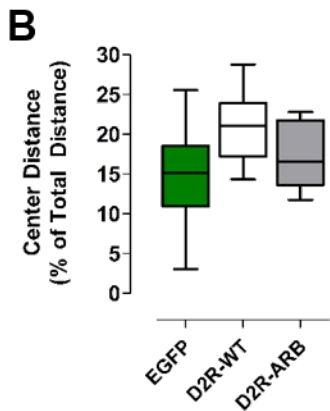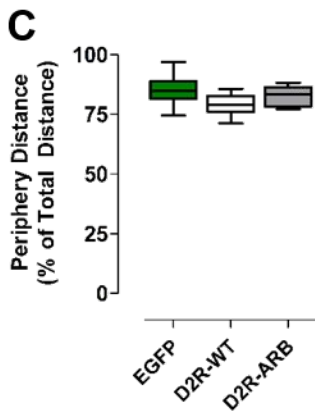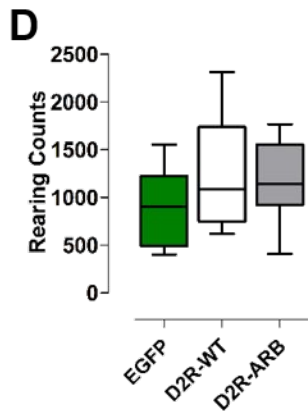

Supplement: NIHMS977826-supplement-9.pdf [file NIHMS977826-supplement-9.pdf]
